# Supplementary material for: An Incentive Mechanism for Private Parking-Sharing Programs in an Imperfect Information Setting
Source: Atypon-hosted journal article supplement (doi:10.1287/serv.2022.0303), 2022-04-08
Supplement: serv.2022.0303.sm1.pdf [file serv.2022.0303.sm1.pdf]

**Online Supplement of Paper:**

**An Incentive Mechanism for Private Parking-sharing Programs in Imperfect Information Setting**

**1. Proofs of Theorems and Properties**

**1.1. Proof of Theorem 1**

The first part of Theorem 1 follows directly from the definition of the optimal matching solution. As for the second part, note that in an optimal matching solution of Problem  $P^*$  with the driver set  $\{i\} \cup C$ , the matching pairs for drivers  $i \in C$  are also feasible for Problem  $P^*$  with the driver set  $C$ . This implies that for any  $C \subseteq I \setminus \{i\}$ ,  $\hat{a}_i$  and  $\hat{a}^C$ ,

$$\begin{aligned} p_i^{VCG}(m_i^*(\hat{a}^{\{i\} \cup C})) &= \sum_{k \in C} v_k(m_k^*(\hat{a}^C)) - \sum_{k \in C} v_k(m_k^*(\hat{a}^{\{i\} \cup C})) \\ &= V(M^*(\hat{a}^C)) - \sum_{k \in C} v_k(m_k^*(\hat{a}^{\{i\} \cup C})) \\ &\geq 0 \end{aligned} \tag{1}$$

where  $\sum_{k \in C} v_k(m_k^*(\hat{a}^{\{i\} \cup C}))$  is the sum of the values of all drivers in  $C$  generated by the optimal matching solution of Problem  $P^*$  with the driver set  $\{i\} \cup C$ , which, by the definition of optimality, is less than the optimal objective value of Problem  $P^*$  with the driver set  $C$ .

Therefore, Equation (1) holds when all drivers in  $\{i\} \cup C$  truthfully report their  $\hat{a}^{\{i\} \cup C} = (a_i^{K_i}, a_{k_1}^{K_{k_1}}, a_{k_2}^{K_{k_2}}, \dots, a_{k_{|C|}}^{K_{k_{|C|}}})$ . Finally, the system transfers the payment  $p_i^{VCG}(m_i^*(\hat{a}^{\{i\} \cup C})) \geq 0$  to the matched owner. The compensation of any matched owner  $j$  is greater than 0 and the sum of all owners' compensations is equal to the sum of all drivers' payments. This completes the proof of Theorem 1.

**1.2. Proof of Property 1**

Consider any  $i \in I$  and  $C \subseteq I \setminus \{i\}$ . It is necessary to show that for any report profile  $\hat{a}^{\{i\} \cup C}$ ,  $V(M^*(\hat{a}^{\{i\} \cup C})) \geq V(M^*(\hat{a}^C))$ . For this purpose, we have three cases. When driver  $i$ 's entry and her report  $\hat{a}_i$  do not induce the system assign her a slot, there is no impact on the slot allocation among all the drivers in  $C$ . Given our assumption that a driver's value is zero (no travel cost saving) if she is not matched with any slot, then  $V(M^*(\hat{a}^{\{i\} \cup C})) = V(M^*(\hat{a}^C))$ . When driver  $i$ 's entry and her report  $\hat{a}_i$  induces the system to assign her a slot and the slot allocation among all the drivers in  $C$  is unchanged, with the assumption that a matched driver has a positive value (travel cost saving), we have  $V(M^*(\hat{a}^{\{i\} \cup C})) > V(M^*(\hat{a}^C))$ . Finally, when driver  $i$  enters and gets a slot, and her report  $\hat{a}_i$  changes the slot allocation for drivers in  $C$  (i.e.,  $(m_k^*(\hat{a}^{\{i\} \cup C}))_{k \in C} \neq (m_k^*(\hat{a}^C))_{k \in C}$ ), the match  $[\emptyset, (m_k^*(\hat{a}^C))_{k \in C}]$  is a feasible solution to Problem  $P^*$  with the driver set  $\{i\} \cup C$ . Then based on the definition of optimality, we have  $V(M^*(\hat{a}^{\{i\} \cup C})) \geq V(\emptyset, (m_k^*(\hat{a}^C))_{k \in C}) = V(M^*(\hat{a}^C))$ . The proof of Property 1 is completed.

### 1.3. Proof of Theorem 2

For any  $i \in I$ ,  $C \subseteq I \setminus \{i\}$  and  $\hat{a}^{\{i\} \cup C}$ , from Equation (13) in the paper, to prove  $U_i^{VCG}(\hat{a}_i, \hat{a}_{-i}, \xi) \geq 0$ , it suffices to show  $V(M^*(\hat{a}^{\{i\} \cup C})) \geq V(M^*(\hat{a}^C))$ . Clearly, this inequality is ensured by Property 1. Theorem 2 is thus proved.

### 1.4. Proof of Theorem 3

For driver  $i$ 's choice of  $\hat{a}_i^{K_i}$  to strategically dominate any other choice  $a_i^k, 1 \leq k < K_i$ , it must hold that for any given  $\hat{a}^C$  ( $C \subseteq I \setminus \{i\}$ ),

$$U_i^{VCG}(a_i^{K_i}, \hat{a}^C, \xi) \geq U_i^{VCG}(\hat{a}_i^k, \hat{a}^C, \xi), \quad 1 \leq k < K_i, \forall i \in I \quad (2)$$

Based on Equation (13) in the paper, to show that Equation (2) holds, it is sufficient to show that for any  $C \subseteq I \setminus \{i\}$  and any  $1 \leq k < K_i$ ,  $u_i^{VCG}(m_i^*(a_i^{K_i}, \hat{a}^C)) \geq u_i^{VCG}(m_i^*(a_i^k, \hat{a}^C))$  holds.

Under the proposed VCG-based pricing mechanism given in Equation (10) of the paper, we have

$$\begin{aligned} u_i^{VCG}(M^*(a_i^{K_i}, \hat{a}^C)) &= V^*(M^*(a_i^{K_i}, \hat{a}^C)) - V^*(M^*(\hat{a}^C)), \text{ and} \\ u_i^{VCG}(M^*(a_i^k, \hat{a}^C)) &= V^*(M^*(a_i^k, \hat{a}^C)) - V^*(M^*(\hat{a}^C)), 1 \leq k < K_i. \end{aligned} \quad (3)$$

Based on the definition of the strategy set  $A_i$  in Section 4 of the paper, we have  $J_i(a_i^k) \subseteq J_i(a_i^{K_i}), 1 \leq k < K_i$ , which means that driver  $i$ 's report  $a_i^{K_i}$  leads to a larger size of feasible slot set than any other report  $a_i^k, 1 \leq k < K_i$ . Also, note that other drivers' feasible sets are fixed due to the given strategy (report) profile  $\hat{a}^C$ . Then the expanded feasible slot set of driver  $i$  (weakly) raises the optimal objective value of Problem  $P^*$  with the driver set  $\{i\} \cup C$ . Thus we have

$$V^*(M^*(a_i^{K_i}, \hat{a}^C)) \geq V^*(M^*(a_i^k, \hat{a}^C)), 1 \leq k < K_i. \quad (4)$$

Equations (3) and (4) jointly imply  $u_i^{VCG}(m_i^*(a_i^{K_i}, \hat{a}^C)) \geq u_i^{VCG}(m_i^*(a_i^k, \hat{a}^C)), 1 \leq k < K_i$ . We thus have Theorem 3.

### 1.5. Proof of Theorem 4

Based on Theorems 2 and 3, we know that all drivers  $i \in I$  choose to truthfully report and accept the system's recommended slots if they choose to report at  $\tau = 1$ . Thus, it is sufficient to show that it is optimal to report at  $\tau = 1$  for all drivers  $i \in I$ . Consider driver  $i$ 's choice at  $\tau = \Gamma - 1$ . Suppose that driver  $i$  reports at  $\tau = \Gamma - 1$ . For any given  $C_{\Gamma-1}$  ( $i \notin C_{\Gamma-1}$ ), if she chooses to reject the system's recommendation  $m_i^*(\hat{a}^{\{i\} \cup C_{\Gamma-1}})$  and wait to the next reporting time  $\tau = \Gamma$ , her expected net utility is  $\Phi_{i, \Gamma-1}^{VCG}(\{i\} \cup C_{\Gamma-1}) = E_{C_{\Gamma} | C_{\Gamma-1}} \Phi(\{i\} \cup C_{\Gamma}) = \sum_{C_{\Gamma} \subseteq C_{\Gamma}} \Pr(C_{\Gamma} | C_{\Gamma-1}) [v_i(m_i^*(\hat{a}^{\{i\} \cup C_{\Gamma}})) - p_i^{VCG}(m_i^*(\hat{a}^{\{i\} \cup C_{\Gamma}}))]$  where  $C_{\Gamma}$  is the set of drivers who have not reported their types or have rejected all the system's recommendations before  $\tau = \Gamma$  (Below we use  $C_{\tau}$  in a similar way).

If she chooses to accept, her net utility is

$$\varphi_{i,\Gamma-1}^{VCG}(\{i\} \cup C_{\Gamma-1}) = v_i(m_i^*(\hat{a}^{\{i\} \cup C_{\Gamma-1}})) - p_i^{VCG}(m_i^*(\hat{a}^{\{i\} \cup C_{\Gamma-1}}))$$

Therefore, if driver  $i$  reports at  $\tau = \Gamma - 1$ , her expected net utility is  $\max\{\varphi_{i,\Gamma-1}^{VCG}(\{i\} \cup C_{\Gamma-1}), \Phi_{i,\Gamma-1}^{VCG}(\{i\} \cup C_{\Gamma-1})\}$ . However, if driver  $i$  chooses to report at  $\tau = \Gamma$ , she can obtain an expected net utility of  $\Phi_{i,\Gamma-1}^{VCG}(\{i\} \cup C_{\Gamma-1})$ . It is clear that driver  $i$ 's choice of reporting at  $\tau = \Gamma - 1$  is (weakly) better than reporting at  $\tau = \Gamma$  for any  $C_{\Gamma-1} \subseteq \mathcal{C}_{\Gamma-1}$  and any report profiles  $\hat{a}^{\{i\} \cup C_{\Gamma-1}}$  and  $\hat{a}^{\{i\} \cup C_{\Gamma}}$ . By repeating this procedure in a step-by-step manner, we can show that for all drivers  $i \in I$ , reporting at  $\tau$  is (weakly) better than reporting at  $\tau + 1$  for all  $\tau \in \{1, 2, \dots, \Gamma - 1\}$ . Theorem 4 is thus proved.

### 1.6. Proof of Theorem 5

We first show that for  $t \in \{1, 2, \dots, T\}$ , given that drivers truthfully report,  $m_t^*(a^{I_t}, J_t) = m_t^{DE^*}(a^{I_t}, J_t)$ . Consider  $t = T$ . It is clear that Problem  $P^*$  is identical to Problem DE. Then we have  $m_T^*(a^{I_T}, J_T) = m_T^{DE^*}(a^{I_T}, J_T)$  for all pairs of  $I_T$  and  $J_T$ . Next, consider  $t = T - 1$ . The dynamic efficiency requires that  $m_{T-1}^{DE^*}(a^{I_{T-1}}, J_{T-1})$  solves

$$\max_{m_{T-1}(a^{I_{T-1}}, J_{T-1})} E_{I_T, J_T | I_{T-1}, J_{T-1}} \left[ \sum_{k=t}^T V(m_k(a^{I_k}, J_k)) \right].$$

With the independent assumption, this optimization problem can be rewritten as

$$\max_{m_{T-1}(a^{I_{T-1}}, J_{T-1})} V(m_{T-1}(a^{I_{T-1}}, J_{T-1})) + E_{I_T, J_T} [V(m_T^{DE^*}(a^{I_T}, J_T))] \quad (5)$$

Note that the second term of the objective function in (5) is irrelevant to  $m_{T-1}(a^{I_{T-1}}, J_{T-1})$ . Again this implies that the solution to (5) is the same as that to problem  $P^*$  for  $t = T - 1$  (i.e.,  $m_{T-1}^*(a^{I_{T-1}}, J_{T-1}) = m_{T-1}^{DE^*}(a^{I_{T-1}}, J_{T-1})$ ). By repeating this proof procedure in a step-by-step way, we have  $m_t^*(a^{I_t}, J_t) = m_t^{DE^*}(a^{I_t}, J_t)$  for every  $t \in \{1, 2, \dots, T\}$ .

Now we show that the static VCG-based pricing mechanism (with the system-efficient match solution) induces drivers to truthfully report for every period  $t \in \{1, 2, \dots, T\}$ . For  $t = T$  and all pairs of  $I_T$  and  $J_T$ , the dynamic case is the same as the static case. Thus Theorem 3 implies that  $m_{i,t}^*(\hat{a}^{I_t}, J_t)$  and  $p_i^{VCG}(m_{i,t}^*(\hat{a}^{I_t}, J_t))$  induce all drivers  $i \in I_T$  to report truthfully. Consider  $t = T - 1$ . The period- $T$  expected utility of driver  $i \in I_{T-1}$  is

$$E^{i,T} = \sum_{J_T \in \mathbb{J}, I_T \in \mathbb{I} \setminus \{i\}} \Pr_{\mathbb{I}_t}(I_t) \Pr_{\mathbb{J}_t}(J_t) \left[ \sum_{C_T \subseteq I_T} \Pr(i \cup C_T) (v_i(m_{i,t}^*(a^{i \cup C_T}, J_t)) - p_i^{VCG}(m_{i,t}^*(a^{i \cup C_T}, J_t))) \right]$$

which is irrelevant to  $I_{T-1}$  and  $J_{T-1}$  due to the independence assumption.

For any realized  $I_{T-1}$ ,  $J_{T-1}$  and  $C \subseteq I_{T-1} \setminus \{i\}$ , when drivers in  $C$  report  $\hat{a}_{T-1}^C$  and driver  $i$  reports  $\hat{a}_{i,T-1}$ , driver  $i$ 's period- $T-1$  expected utility, denoted by  $E^{i,T-1}(\hat{a}_{i,T-1}, \hat{a}_{T-1}^C)$ , is the expected flow utility obtained in period  $T-1$  plus the expected utility in period  $T$  (i.e.,  $E^{i,T}$ ):

$$E^{i,T-1}(\hat{a}_{i,T-1}, \hat{a}_{T-1}^C) = u_i(m_{T-1}^*((\hat{a}_{i,T-1}, \hat{a}_{T-1}^C), J_{T-1})) + E^{i,T}$$

Since  $E^{i,T}$  is independent of  $(\hat{a}_{i,T-1}, \hat{a}_{T-1}^C)$ , driver  $i$ 's period- $T-1$  incentive to report truthfully or untruthfully relies only on the expected flow utility which is determined by the static VCG-based pricing mechanism and the optimal match solution  $m_{T-1}^*((\hat{a}_{i,T-1}, \hat{a}_{T-1}^C), J_{T-1})$ . Therefore, based on Theorem 3, the static VCG-based pricing mechanism induces driver  $i$  to report truthfully in period  $T-1$  for any  $I_{T-1}$ ,  $J_{T-1}$  and  $C \subseteq I_{T-1} \setminus \{i\}$ . Again, we can repeat this proof for all  $t \in \{1, 2, \dots, T-2\}$  to indicate that the static VCG-based pricing mechanism (with the system-efficient match solution) induces all drivers to report truthfully.

## 2. Nash-equilibrium strategies of an instance with three drivers

### 2.1. Instance description

In this part, we analyze drivers' reporting behaviors in Nash-equilibrium strategies under the time-based linear pricing method. In particular, an instance is given to show that the commonly observed time-based linear pricing method without considering the drivers' walking-time costs may induce drivers to misreport their departure times.

**Figure 1** An illustration of the instance with three drivers and three parking slots

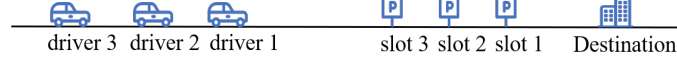

In the instance, as illustrated in Figure 1, three drivers ( $I = \{1, 2, 3\}$ ) are sorted in an ascending order of their driving times to the same destination along a line (i.e.,  $t_1 < t_2 < t_3$ ). Three parking slots ( $J = \{1, 2, 3\}$ ) are sorted in an ascending order of their walking times to the destination (i.e.,  $t'_i(1) < t'_i(2) < t'_i(3), \forall i \in I$ ). According to value Equation (1) in the paper, we have  $v_1(j) < v_2(j) < v_3(j)$  when the three drivers competing for the same parking slot  $j$ ,  $\forall j \in J$ . When driver  $i$  uses parking slot  $j$  for  $w_i(j)$  units of time, her payment is specified by  $p_i(j) = \rho w_i(j)$ , where  $\rho$  is the fixed fee rate (i.e., \$ per minutes) in the time-based linear pricing method. We further suppose that the drivers have the same staying time at the destination and we have  $w_i(1) < w_i(2) < w_i(3), \forall i \in I$ , considering the walking times from the three slots. Therefore, the utility of driver  $i$  of using parking slot  $j$  is

$$u_i(j) = v_i(j) - \rho w_i(j), i \in I, j \in J. \quad (6)$$

Thus, we have the relation:  $u_i(1) > u_i(2) > u_i(3)$ , for the same driver  $i$ ,  $i \in I$  using the three parking slots, which means that there is a diminishing preference for slots 1, 2 and 3.

## 2.2. Nash-equilibrium strategies

Now we establish the demand-reporting game of the three drivers. We suppose that the three parking slots are all feasible for the three drivers if they all report true departure times  $a_i^3$ , i.e.,  $J_i(a_i^3) = J = \{1, 2, 3\}$ ,  $\forall i \in I$ . Accordingly, driver  $i$ 's strategy set is defined as  $A_i = \{a_i^1, a_i^2, a_i^3\}$ ,  $\forall i \in I$ , where  $a_1^1$  and  $a_1^2$  are the other two alternatives for all drivers, resulting in  $J_i(a_1^1) = \{1\}$  and  $J_i(a_1^2) = \{1, 2\}$ , respectively. As a result, we have

*Nash-equilibrium strategies.* With the time-based pricing method, the Nash-equilibrium strategies of the numerical example are constructed as

$$\hat{a}^N = \begin{cases} \{a_1^3, a_2^1, a_3^1\}, & \text{if } u_2(1)(1 - \xi) \geq u_2(2)(3 - \xi), \\ \{a_1^1, a_2^2, a_3^1\}, & \text{if } u_1(1)(1 - \xi) \geq 3u_1(2)(1 - \xi) + 2u_1(3)\xi \text{ and } u_2(1 - \xi) \leq u_2(2)(3 - \xi), \\ \{a_1^3, a_2^2, a_3^1\}, & \text{if } u_1(1)(1 - \xi) \leq 3u_1(2)(1 - \xi) + 2u_1(3)\xi \text{ and } u_2(1 - \xi) \leq u_2(2)(3 - \xi), \end{cases} \quad (7)$$

Let us consider the first Nash-equilibrium strategies in Equation (7), i.e.,  $\hat{a}^N = \{a_1^3, a_2^1, a_3^1\}$ , in which driver 1 truthfully reports her departure time  $a_1^3$  but the other drivers misreport their departure times as  $a_2^1$  and  $a_3^1$ , respectively, if the expected utility  $u_2(1)(1 - \xi)$  is better than  $u_2(2)(1 - \xi)$ . Note that for any equilibrium, the non-dominated strategy of driver 3 is to report  $a_3^1$ . With the (mis)reports in  $\hat{a}^N$ , the system generates an inefficient matching solution  $M^*(\hat{a}^N) = ((1, 2), (2, \emptyset), (3, 1))$ , which induces that driver 2 is not assigned any parking slots while parking slot 3 is not matched with any drivers. However, if the three drivers truthfully report their departure times, i.e.,  $\hat{a} = (a_1^3, a_2^3, a_3^3)$ , there are two system-wide optimal matching solutions  $M^*(\hat{a}) = ((1, 3), (2, 2), (3, 1))$  and  $M'^*(\hat{a}) = ((1, 1), (2, 2), (3, 3))$  with the maximum system efficiency. The system selects either one with the equal possibility. Therefore, compared with the system-wide optimal solution, Nash-equilibrium strategy  $\hat{a}^N = (a_1^3, a_2^1, a_3^1)$  leads to the loss of the system efficiency. Considering the rest two Nash-equilibrium strategies in Equation (7), the second one  $\hat{a}^N = \{a_1^1, a_2^2, a_3^1\}$  induces inefficient matching solutions but the last one does not.

## 2.3. Construction of Nash-equilibrium strategies

The rest part presents the construction method of the Nash-equilibrium strategies of the instance, which is used to find all Nash-equilibrium strategies in the numerical experiment of the paper.

First of all, the non-dominated strategy sets of three drivers are identified as  $A_1 = \{a_1^1, a_2^1, a_3^1\}$ ,  $A_2 = \{a_2^1, a_2^2\}$  and  $A_3 = \{a_3^1\}$ , respectively, according to the optimal matching model  $P^*$  in the paper. As driver 3 has the only strategy  $a_3^1$ , thus we just need to consider the selected strategies of the other drivers from their non-dominated strategy sets  $A_1$  and  $A_2$ , respectively. Consider driver 1, if driver 2 selects her strategy as  $a_2^1$ , the expected utilities of driver 1 by selecting each strategy from  $A_1$  are

$$\mathbb{E}u_1(a_1^1, a_2^1, a_3^1) = u_1(1) * (1 - \xi)^2, \quad (8)$$

$$\mathbb{E}u_1(a_1^2, a_2^1, a_3^1) = u_1(1) * (1 - \xi)^2 + u_1(2) * (2\xi - \xi^2), \quad (9)$$

$$\mathbb{E}u_1(a_1^3, a_2^1, a_3^1) = u_1(1) * (1 - \xi)^2 + u_1(2) * (2\xi - \xi^2). \quad (10)$$

Moreover, we have

$$\mathbb{E}u_1(a_1^1, a_2^1, a_3^1) \leq \mathbb{E}u_1(a_1^2, a_2^1, a_3^1) = \mathbb{E}u_1(a_1^3, a_2^1, a_3^1). \quad (11)$$

The above relation implies that strategy  $a_1^3$  is the best one for driver 1 if the selected strategies of the other drivers are  $a_2^1$  and  $a_3^1$ .

Similarly, if driver 2 selects her strategy as  $a_2^2$ , we have

$$\mathbb{E}u_1(a_1^3, a_2^2, a_3^1) \geq \mathbb{E}u_1(a_1^2, a_2^2, a_3^1). \quad (12)$$

$$\begin{cases} \mathbb{E}u_1(a_1^3, a_2^2, a_3^1) \leq \mathbb{E}u_1(a_1^1, a_2^2, a_3^1), & u_1(1) * (1 - \xi) \geq 3u_2(1) * (1 - \xi) + u_1(3) * \xi, \\ \mathbb{E}u_1(a_1^3, a_2^2, a_3^1) \geq \mathbb{E}u_1(a_1^1, a_2^2, a_3^1) & \text{otherwise.} \end{cases} \quad (13)$$

Note that for the strategies profile  $\{a_1^2, a_2^2, a_3^1\}$  and  $\{a_1^3, a_2^2, a_3^1\}$ , when driver 3 does not show up, there are two optimal matching solutions to optimal matching model, (i.e.,  $\{m(1, 1), m(2, 2)\}$  and  $\{m(1, 2), m(2, 1)\}$ ). The system breaks the tie by randomly selecting either  $\{m(1, 1), m(2, 2)\}$  or  $\{m(1, 2), m(2, 1)\}$  as the generated matching solution.

For driver 2, if driver 1 selects her strategy as  $a_1^1$ ,  $a_1^2$ , or  $a_1^3$ , the corresponding expected utilities of driver 2 by selecting each strategy in  $A_2$  are calculated as follows.

If driver 1 selects a strategy  $a_1^1$ , we have

$$\begin{cases} \mathbb{E}u_2(a_1^1, a_2^1, a_3^1) \geq \mathbb{E}u_2(a_1^1, a_2^2, a_3^1), & u_2(1) * (1 - \xi) \geq u_2(2) * (2 - \xi) \\ \mathbb{E}u_2(a_1^1, a_2^1, a_3^1) \leq \mathbb{E}u_2(a_1^1, a_2^2, a_3^1). & \text{otherwise} \end{cases} \quad (14)$$

If driver 1 selects a strategy  $a_1^2$ , we have

$$\begin{cases} \mathbb{E}u_2(a_1^2, a_2^1, a_3^1) \geq \mathbb{E}u_2(a_1^2, a_2^2, a_3^1), & u_2(1) * (1 - \xi) \geq u_2(2) * (3 - \xi) \\ \mathbb{E}u_2(a_1^2, a_2^1, a_3^1) \leq \mathbb{E}u_2(a_1^2, a_2^2, a_3^1). & \text{otherwise} \end{cases} \quad (15)$$

If driver 1 selects a strategy  $a_1^3$ , we have

$$\begin{cases} \mathbb{E}u_2(a_1^3, a_2^1, a_3^1) \geq \mathbb{E}u_2(a_1^3, a_2^2, a_3^1), & u_2(1) * (1 - \xi) \geq u_2(2) * (3 - \xi) \\ \mathbb{E}u_2(a_1^3, a_2^1, a_3^1) \leq \mathbb{E}u_2(a_1^3, a_2^2, a_3^1). & \text{otherwise} \end{cases} \quad (16)$$

Now we deduce the Nash-equilibrium strategy profiles according to the above equations. The relations (11)-(13) mean that under some specific conditions, the stable strategy profiles for driver 1 have  $\{a_1^3, a_2^1, a_3^1\}$ ,  $\{a_1^2, a_2^1, a_3^1\}$ ,  $\{a_1^3, a_2^2, a_3^1\}$  and  $\{a_1^1, a_2^2, a_3^1\}$ . Similarly, the relations (14)-(16) mean that under some certain conditions, the stable strategy profiles for driver 2 have  $\{a_1^1, a_2^1, a_3^1\}$ ,  $\{a_1^1, a_2^2, a_3^1\}$ ,  $\{a_1^2, a_2^1, a_3^1\}$ ,  $\{a_1^1, a_2^2, a_3^1\}$ ,  $\{a_1^3, a_2^1, a_3^1\}$  and  $\{a_1^3, a_2^2, a_3^1\}$ . The Nash-equilibrium profiles are just the intersection of stable strategy profiles of driver 1 and 2. Consequently, we obtain the three Nash-equilibrium strategies in Equation (7).
